# Supplementary material
Source: publisher figshare collection journal article supplement (https://sage.figshare.com/ndownloader/files/21110037)
Supplement: Supplementary file 1 [file 21110037]

## Appendix A

### Interview Schedule: Parents/siblings remaining behind in South Africa)

(Preamble: I would like to discuss with you your experience of having children and/or family members who have left the country and are living overseas. I am conducting a research project exploring the experiences of international migration on the remaining family and also how the international migration of some of the children may impact upon the family dynamics.

1. Tell me a bit about your family and help me draw up a family tree of your family
2. Where do you children live? When did the ones who left South Africa go?
3. How did you feel when you heard about the emigration?
4. How have you coped with the emigration?
5. How's the emigration impacted upon your family life?
6. How do you keep in touch?
7. How do you make use of electronic communication?
8. What are the advantages/disadvantages of this type of communication?
9. Are there visits in both directions? Explore the nature visits
10. Can you tell me about your grandchildren (if applicable) and your relationship with them?
11. What has been the hardest thing about having children/grandchildren/siblings so far away?
12. What are your support systems?
13. Describe your friends and your regular social engagements?
14. What advice would you have for others in your situation?

### Interview Schedule: Children living abroad

1. Tell me a bit about your family and help me draw up a family tree of your family
2. When did you leave South Africa?
3. What motivated your decision to emigrate?
4. How did you communicate your decision to your family?
5. How did you feel when you heard about the emigration?
6. How have you coped with the emigration?
7. How's the emigration impacted upon your family life?

8. How do you keep in touch with your family back home?
9. How do you make use of electronic communication?
10. What are the advantages/disadvantages of this type of communication?
11. Are there visits in both directions? Explore the nature of visits
12. Can you tell me about your parents/ siblings back in South Africa and your relationship with them?
13. What has been the hardest thing about having family so far away?
14. What are your support systems in your country of destination?
15. What advice would you have for others in your situation?
